# Supplementary material for: Assessment of Metabolic Interaction between Repaglinide and Quercetin via Mixed Inhibition in the Liver: In Vitro and In Vivo
Source: MDPI journal article supplement (doi:10.3390/pharmaceutics13060782), 2021-05-23
Supplement: s1 [file s1]

# Supplementary Materials: Assessment of Metabolic Interaction between Repaglinide and Quercetin via Mixed Inhibition in the Liver: In Vitro and In Vivo

Ji-Min Kim, Seong-Wook Seo, Dong-Gyun Han, Hwayoung Yun and In-Soo Yoon

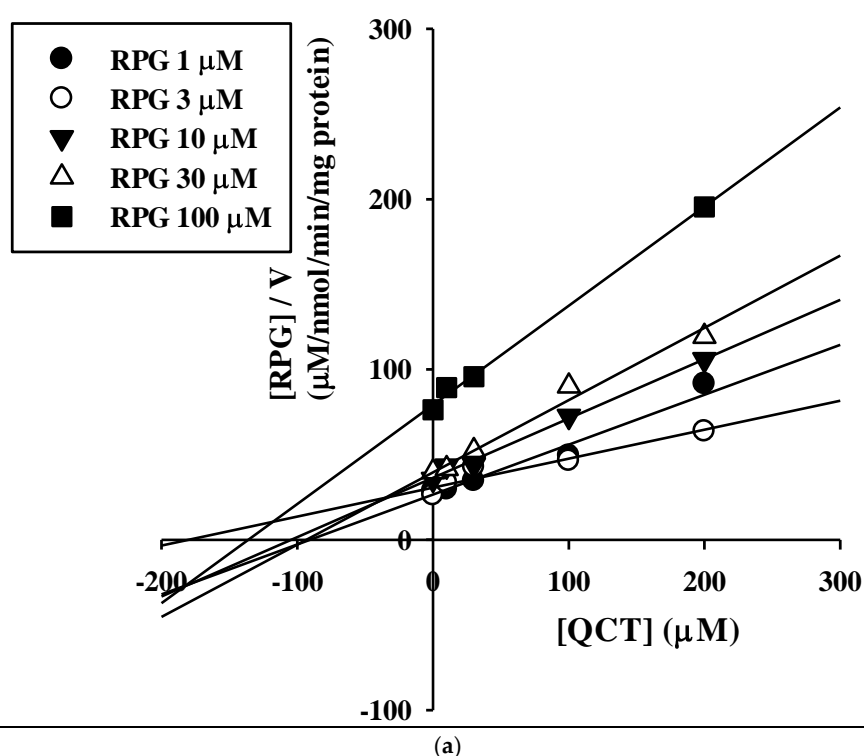

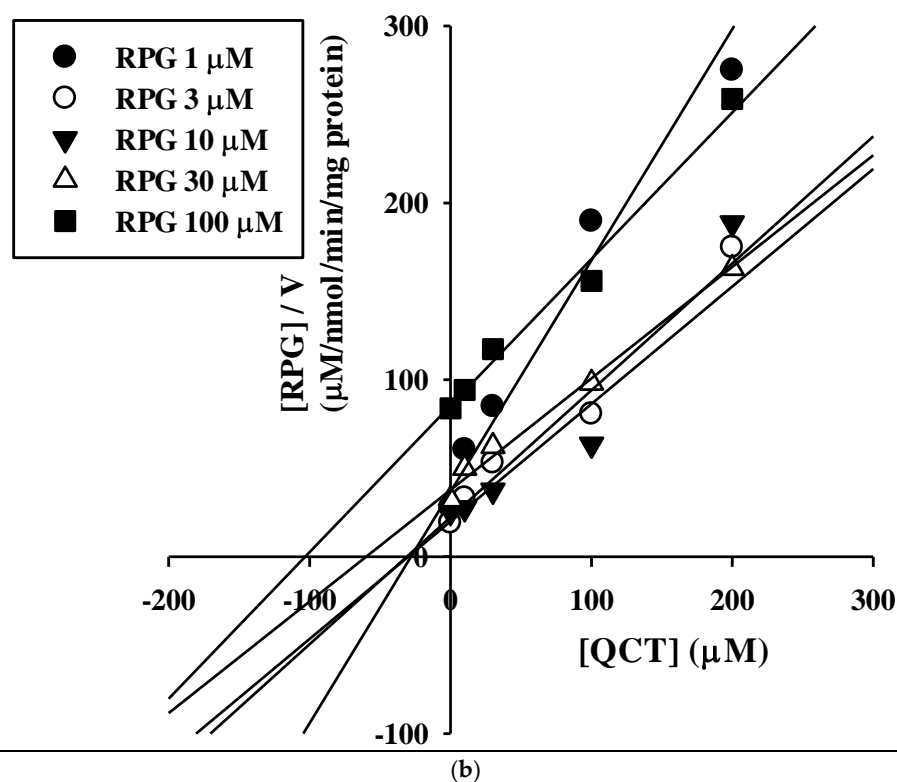

**Figure S1.** Cornish-Bowden plots for the inhibitory effects of QCT on the metabolism of RPG in RLM (a) and HLM (b).

**Table S1.** Within-run and between-run precision and accuracy of the present bioanalytical method for the quantification of RPG in biological matrices ( $n = 3$ ).

| Nominal Concentration<br>(ng/mL) | Precision (%) |             | Accuracy (%) |             |
|----------------------------------|---------------|-------------|--------------|-------------|
|                                  | Within-run    | Between-run | Within-run   | Between-run |
| Plasma                           |               |             |              |             |
| LLOQ (10)                        | 3.41          | 2.54        | 97           | 101         |
| LQC (30)                         | 6.99          | 6.62        | 96           | 105         |
| MQC (120)                        | 8.74          | 4.90        | 98           | 98          |
| HQC (1200)                       | 1.93          | 5.31        | 105          | 99          |
| Urine                            |               |             |              |             |
| LLOQ (10)                        | 5.74          | 5.77        | 99           | 100         |
| LQC (30)                         | 2.20          | 4.67        | 106          | 106         |
| MQC (120)                        | 2.23          | 2.82        | 108          | 107         |
| HQC (1200)                       | 6.65          | 6.60        | 97           | 99          |
| GI                               |               |             |              |             |
| LLOQ (10)                        | 8.82          | 7.08        | 100          | 103         |
| LQC (30)                         | 5.01          | 5.37        | 103          | 105         |
| MQC (120)                        | 3.66          | 2.17        | 108          | 109         |
| HQC (1200)                       | 5.03          | 5.02        | 97           | 99          |
| PBS                              |               |             |              |             |
| LLOQ (10)                        | 6.17          | 4.51        | 102          | 100         |
| LQC (30)                         | 6.70          | 5.66        | 102          | 100         |
| MQC (120)                        | 5.30          | 2.35        | 100          | 101         |
| HQC (1200)                       | 1.36          | 1.42        | 101          | 100         |
| HLM                              |               |             |              |             |
| LLOQ (50)                        | 4.94          | 3.96        | 99           | 99          |
| LQC (150)                        | 1.84          | 6.86        | 106          | 102         |
| MQC (600)                        | 4.52          | 3.62        | 106          | 100         |
| HQC (1200)                       | 1.16          | 2.94        | 105          | 102         |

|            |      |      |     |     |
|------------|------|------|-----|-----|
| RLM        |      |      |     |     |
| LLOQ (50)  | 4.25 | 3.56 | 104 | 108 |
| LQC (150)  | 1.98 | 1.92 | 102 | 102 |
| MQC (600)  | 8.68 | 1.08 | 100 | 101 |
| HQC (1200) | 3.48 | 3.82 | 104 | 98  |

**Table S2.** Within-run and between-run precision and accuracy of the present bioanalytical method for the quantification of QCT in biological matrices ( $n = 3$ ).

| Nominal Concentration<br>(ng/mL) | Precision (%) |             | Accuracy (%) |             |
|----------------------------------|---------------|-------------|--------------|-------------|
|                                  | Within-run    | Between-run | Within-run   | Between-run |
| Plasma                           |               |             |              |             |
| LLOQ (100)                       | 2.97          | 1.21        | 106          | 106         |
| LQC (300)                        | 3.66          | 5.82        | 99           | 99          |
| MQC (1600)                       | 3.65          | 5.00        | 107          | 104         |
| HQC (8000)                       | 0.56          | 0.37        | 105          | 106         |
| PBS                              |               |             |              |             |
| LLOQ (100)                       | 5.42          | 4.90        | 92           | 92          |
| LQC (300)                        | 2.29          | 4.69        | 108          | 104         |
| MQC (1600)                       | 7.71          | 6.34        | 103          | 105         |
| HQC (8000)                       | 5.38          | 2.72        | 108          | 109         |

**Table S3.** Parameters related to the estimation of R value.

| Parameter                    | Value     | Description & Source                             |
|------------------------------|-----------|--------------------------------------------------|
| $f_{u,QCT}$                  | 0.0462    | In-house                                         |
| $f_{u,mic,QCT}$              | 0.381     | In-house                                         |
| $IC_{50}$ ( $\mu M$ )        | 1.66      | Figure 4                                         |
| $S$ ( $\mu M$ )              | 5         | Figure 3                                         |
| $K_m$ ( $\mu M$ )            | 27.02     | Figure 3                                         |
| Observed $K_i$ ( $\mu M$ )   | 8.712     | Figure 5                                         |
| Calculated $K_i$ ( $\mu M$ ) | 0.534     | $(f_{u,mic,QCT} \times IC_{50}) / (S / K_m + 1)$ |
| $I_{max,u}$ ( $\mu M$ )      | 0.290     | [1]                                              |
| R                            | 1.03–1.54 | $1 + I_{max,u} / K_i$                            |

Based on the FDA guideline [2], the magnitude of in vivo clinical herb-drug interaction (HDI) between RPG and QCT was predicted using the basic (simple static) model (Equation (S1)), assuming that RPG is eliminated exclusively by hepatic CYP-mediated metabolism and QCT acts as a reversible inhibitor for RPG metabolism.

$$R = 1 + I_{max,u} / K_i \quad (S1)$$

where R is the predicted ratio of the AUC of RPG in the presence and absence of QCT,  $I_{max,u}$  is the maximum unbound plasma concentration of QCT, and  $K_i$  is the unbound inhibition constant determined in vitro or estimated by the following equation (Equation (S2)). The FDA guideline indicates that, if  $R \geq 1.02$ , the sponsor should further investigate the DDI potential by either using mechanistic models or conducting a clinical DDI study with a sensitive index substrate.

$$K_i = IC_{50} / (S / K_m + 1) \quad (S2)$$

where S is the fixed concentration of RPG, and  $K_m$  is the Michaelis-Menten constant. The parameters relevant to the estimation of R value are listed below. Based on the estimated R value, it is plausible that QCT could acts as a clinically significant inhibitor for RPG metabolism, suggesting the HDI potential between RPG and QCT in clinical setting, which warrants further in vivo clinical investigation.

## References

1. Ganio, M. S.; Armstrong, L. E.; Johnson, E. C.; Klau, J. F.; Ballard, K. D.; Michniak-Kohn, B.; Kaushik, D.; Maresh, C. M. Effect of quercetin supplementation on maximal oxygen uptake in men and women. *J. Sports Sci.* **2010**, *28*, 201–208.

- 
2. Center for Drug Evaluation and Research. In Vitro Drug Interaction Studies: Cytochrome P450 Enzyme- and Transporter-Mediated Drug Interactions. *USA Food and Drug Administration Guidance for Industry*. **2020**, Available online: <https://www.fda.gov/media/134582/download>. (Accessed date: 1/5/2021)
